# Supplementary material
Source: publisher site journal article supplement (https://www.degruyterbrill.com/publication/journal_key/MIM/downloadAsset/MIM_Article%20Processing%20Charges.docx)
Supplement: Supplementary file 1 [file MIM_Article%20Processing%20Charges.docx]

**Article Processing Charges:  *Methods in Microscopy***

In order to sustain the publication of our fully refereed journal, all articles accepted for publication in *Methods in Microscopy* will be subject to an Article Processing Charge (APC). This fee is used to cover the cost of the editorial process, professional typesetting and copyediting, as well as online hosting and long-term preservation.

Information regarding payment of the APC will be provided after an article has been accepted for publication. Enquiries regarding APCs should be addressed to the Publishing Editor - [editor@methodsmicroscopy.org](mailto:editor@methodsmicroscopy.org)

APCs are collected via the RightsLink system (provided by Copyright Clearance Centre). The payment can be made in EUR, USD or GBP, and may be subject to VAT where applicable.

**The current APC for *Methods in Microscopy* is** **€2000**.

**Discount and Waiver Policy**

If the first named author is affiliated with an organization that has an [open access agreement](https://www.degruyter.com/publishing/publications/openaccess/open-access-agreements) with De Gruyter, the APC may be covered or discounted.

In addition, Thoss Media and De Gruyter are committed to supporting researchers in emerging nations to share their research with a global audience. As per [World Bank definitions](https://datahelpdesk.worldbank.org/knowledgebase/articles/906519), first named authors from lower income countries will be entitled to a 100% discount on the APC and first named authors from lower middle income countries will be entitled to a 50% discount on the APC.

**In the initial publication years we will also consider requests for discretionary waivers for researchers who aren’t eligible under the criteria above.**

For any questions relating to discounts and waivers please contact the Publishing Editor - [editor@methodsmicroscopy.org](mailto:editor@methodsmicroscopy.org)
